## REVIEW

# A unique mode of tissue oxygenation and the adaptive radiation of teleost fishes

D. J. Randall<sup>1,\*</sup>, J. L. Rummer<sup>2</sup>, J. M. Wilson<sup>3</sup>, S. Wang<sup>4</sup> and C. J. Brauner<sup>1</sup>

## ABSTRACT

Teleost fishes constitute 95% of extant aquatic vertebrates, and we suggest that this is related in part to their unique mode of tissue oxygenation. We propose the following sequence of events in the evolution of their oxygen delivery system. First, loss of plasma-accessible carbonic anhydrase (CA) in the gill and venous circulations slowed the Jacobs–Stewart cycle and the transfer of acid between the plasma and the red blood cells (RBCs). This ameliorated the effects of a generalised acidosis (associated with an increased capacity for burst swimming) on haemoglobin (Hb)–O<sub>2</sub> binding. Because RBC pH was uncoupled from plasma pH, the importance of Hb as a buffer was reduced. The decrease in buffering was mediated by a reduction in the number of histidine residues on the Hb molecule and resulted in enhanced coupling of O<sub>2</sub> and CO<sub>2</sub> transfer through the RBCs. In the absence of plasma CA, nearly all plasma bicarbonate ultimately dehydrated to CO<sub>2</sub> occurred via the RBCs, and chloride/bicarbonate exchange was the rate-limiting step in CO<sub>2</sub> excretion. This pattern of CO<sub>2</sub> excretion across the gills resulted in disequilibrium states for CO<sub>2</sub> hydration/dehydration reactions and thus elevated arterial and venous plasma bicarbonate levels. Plasma-accessible CA embedded in arterial endothelia was retained, which eliminated the localized bicarbonate disequilibrium forming CO<sub>2</sub> that then moved into the RBCs. Consequently, RBC pH decreased which, in conjunction with pH-sensitive Bohr/Root Hbs, elevated arterial oxygen tensions and thus enhanced tissue oxygenation. Counter-current arrangement of capillaries (retia) at the eye and later the swim bladder evolved along with the gas gland at the swim bladder. Both arrangements enhanced and magnified CO<sub>2</sub> and acid production and, therefore, oxygen secretion to those specialised tissues. The evolution of β-adrenergically stimulated RBC Na<sup>+</sup>/H<sup>+</sup> exchange protected gill O<sub>2</sub> uptake during stress and further augmented plasma disequilibrium states for CO<sub>2</sub> hydration/dehydration. Finally, RBC organophosphates (e.g. NTP) could be reduced during hypoxia to further increase Hb–O<sub>2</sub> affinity without compromising tissue O<sub>2</sub> delivery because high-affinity Hbs could still adequately deliver O<sub>2</sub> to the tissues via Bohr/Root shifts. We suggest that the evolution of this unique mode of tissue O<sub>2</sub> transfer evolved in the Triassic/Jurassic Period, when O<sub>2</sub> levels were low, ultimately giving rise to the most extensive adaptive radiation of extant vertebrates, the teleost fishes.

**KEY WORDS:** Carbon dioxide, Oxygen, Teleosts

## Introduction

Teleost fishes comprise 95% of all extant fishes, with approximately 26,000 named species (Helfman et al., 1997). Teleosts first appeared in the early Triassic period 200–250 million years ago (MYA) and have since radiated into almost all aquatic environments (Nelson, 1994; Near et al., 2012). The ray-finned fishes, to which the teleost fishes belong, diverged from the lobe-finned fishes (e.g. lungfishes) around the Devonian, 400 MYA. The lobe-finned fishes were very successful until the Permian crisis 252 MYA, and gave rise to nearly all terrestrial vertebrates (Clack, 2007). In contrast, only a limited number of ray-finned fishes evolved into semi-terrestrial air-breathing species, while the vast majority remained completely aquatic (Randall et al., 1981; Graham, 1997). The Permian crisis, also known as the Permian mass extinction, was caused by extensive volcanic activity and global fires, and resulted in the loss of 96% of marine fish species. Following the Permian, the ray-finned fishes invaded many habitats from which the lobe-finned fishes had been extirpated. Explanations of the teleost success involve modifications in swimming and feeding, with genome duplication (3R) enhancing the rate of evolution of these processes (Ilves and Randall, 2007).

It should be noted that aquatic oxygen levels remained low for approximately 100 million years after the Permian crisis and only increased to levels approaching present-day conditions during the Cretaceous (Fig. 1). Teleosts radiated after the Permian (Bellwood and Hoey, 2004) during a prolonged period of low oxygen levels, and we propose that hypoxia tolerance was key to the teleost success after the Permian crisis; subsequent radiation depended on modifications in feeding and swimming. We propose that hypoxia tolerance is related to a unique mode of tissue oxygen delivery in teleost fishes as described below.

## Hypoxia tolerance in teleost fishes

Many extant teleost fishes can survive environmental hypoxia. Their scope for activity is reduced, but they are able to maintain resting oxygen consumption rates ( $\dot{M}_{O_2}$ ) as dissolved oxygen levels in the water decrease to a critical level ( $P_{crit}$ ). Below  $P_{crit}$ ,  $\dot{M}_{O_2}$  falls with further reductions in water oxygen levels. Many hypoxia-tolerant teleost fishes do not exhibit this decrease until the partial pressure of oxygen ( $P_{O_2}$ ) in water is below 30 mmHg, much lower than in other vertebrates (Nilsson and Randall, 2010). Numerous factors enable teleost fishes to survive in low-oxygen environments. First, counter-current flow of blood and water at the gills allows for up to 80% of oxygen extraction from water (reviewed by Randall and Daxboeck, 1984). During hypoxia, water flow over the gills and gill oxygen diffusing capacity both increase, while heart rate decreases (Holeton and Randall, 1967). Gill oxygen diffusing capacity increases during hypoxia via several mechanisms; for example, the heart beats in phase with the oscillations in ventilation, such that blood flow through the gills slows down during times of high water flow (Randall and Smith, 1967). Also during hypoxia, cardiac stroke volume approaches that of the vascular volume of the gills so that,

<sup>1</sup>Department of Zoology, University of British Columbia, 6270 University Boulevard, Vancouver, BC V6T 1Z4, Canada. <sup>2</sup>Australian Research Council Centre of Excellence for Coral Reef Studies, James Cook University, Townsville, QLD, 4811 Australia. <sup>3</sup>Ecofisiologia Centro de Investigação Interdisciplinar Marinha e Ambiental (CIIMAR), Rua dos Bragas 289, 4050-123 Porto, Portugal. <sup>4</sup>Fisheries College, Jimei University, 43 Yindou Road, Xiamen 361021, China.

\*Author for correspondence (randall@zoology.ubc.ca)

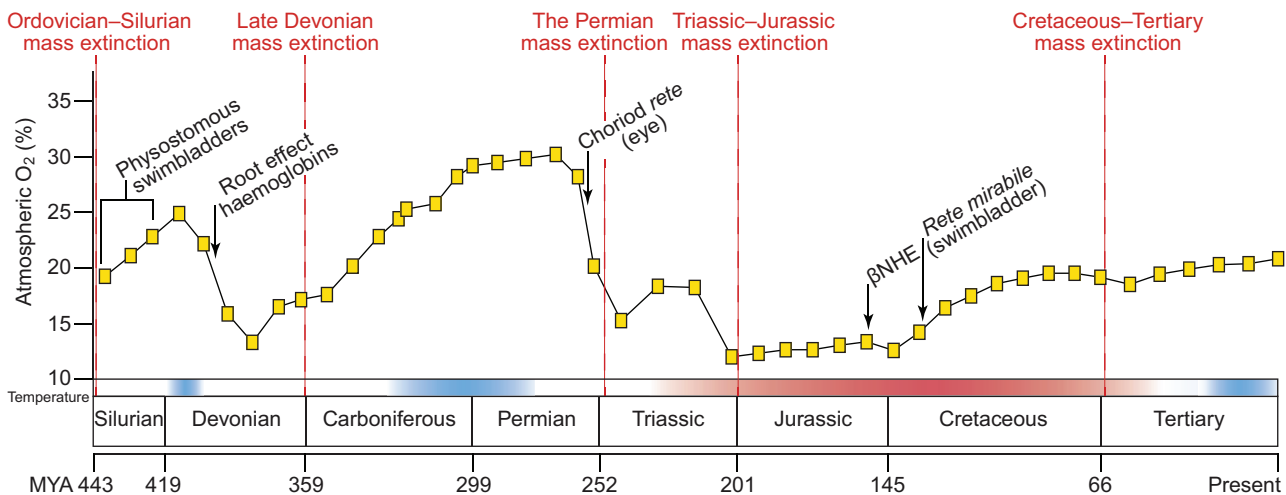

**Fig. 1. Changes in oxygen levels (% atmospheric) over time (millions of years ago; MYA).** Red and blue indicate global warm and cold periods [derived from information in previous studies (Berenbrink et al., 2005; Clack, 2007; Ward, 2006)].

with each heartbeat, the gills are completely filled with new blood (Randall and Daxboeck, 1984). Blood pressure increases, and blood enters all gill lamellae, thus increasing the residence time of the blood within the gills (Booth, 1978). In addition, changes in blood flow through each lamella may enhance gill diffusing capacity (for details, see Randall and Daxboeck, 1984). Another means for increasing diffusing capacity during hypoxia (but not anoxia) has been observed in carp, where an interlamellar epithelial cell mass between the gill lamellae is removed through apoptosis (Sollid et al., 2003), which increases gill surface area and decreases epithelium diffusion distance (Matey et al., 2008). Fish increase blood Hb concentrations during hypoxia but, unlike mammals, many teleost fish also increase Hb–oxygen (Hb–O<sub>2</sub>) affinity (Val, 2000) by decreasing levels of organic phosphates (e.g. ATP and GTP) within the nucleated red blood cells (RBCs). Changes in ATP and GTP levels are linked to oxidative phosphorylation (Wells, 2009), formation of magnesium complexes (Houston, 1985), and the action of catecholamines, corticosteroids and changes in pH (Val, 2000). While the mechanism is not fully understood, what is clear is that, in many teleosts, RBC ATP and GTP levels decrease in response to hypoxia, and Hb–O<sub>2</sub> affinity increases. In contrast, a few air-breathing teleost fish have high levels of 2,3 diphosphoglycerate in their RBCs, which increase during hypoxia, thus decreasing

Hb–O<sub>2</sub> affinity (Val, 2000), a pattern similar to that observed in mammals. The increase in Hb–O<sub>2</sub> affinity observed in teleosts during hypoxia will increase gill oxygen diffusing capacity and enhance oxygen uptake across the gills.

**Oxygen uptake at the tissues**

Uptake into the blood is only the first step in the oxygen delivery system, and an increase in Hb–O<sub>2</sub> affinity could be detrimental for oxygen release to the tissues. What happens at the tissue level? Unfortunately, there are only limited data concerning this question. McKenzie et al. (McKenzie et al., 2004) reported red muscle oxygen levels ( $P_{\text{RMO}_2}$ ) in rainbow trout (Fig. 2) that were much higher than mixed venous blood ( $P_{\text{VO}_2}$ ) oxygen levels (Stevens and Randall, 1967). One explanation is that blood flow relative to metabolic rate is higher in red muscle compared with other tissues and  $P_{\text{RMO}_2} > P_{\text{VO}_2}$  could simply be a function of high muscle blood flow rates. However, there is no evidence for such high blood flows to red muscle in resting animals, being only 9% of cardiac output in resting rainbow trout (Bushnell and Brill, 1992; Randall and Daxboeck, 1982).

Arterial oxygen content ( $C_{\text{aO}_2}$ ) and  $\dot{M}_{\text{O}_2}$  in rainbow trout were not significantly affected by hypoxia (McKenzie et al., 2004). Thus O<sub>2</sub> delivery to the tissues appears unchanged, despite a fourfold reduction in the apparent blood-to-muscle oxygen gradient [arterial

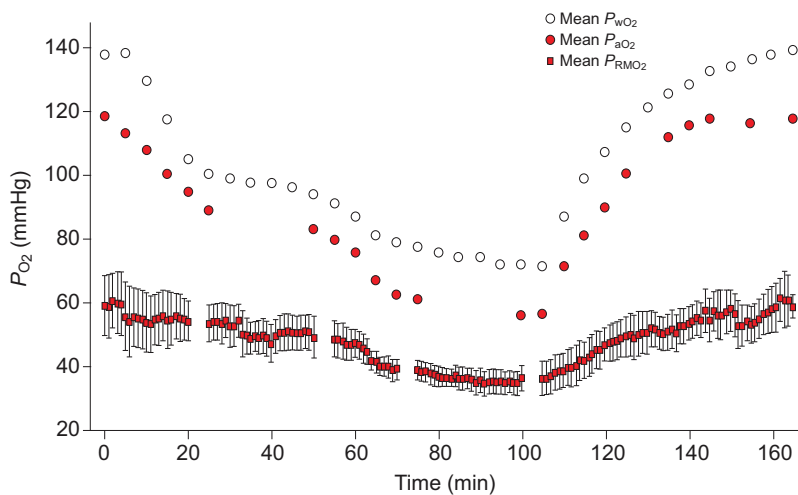

**Fig. 2. Changes in red muscle  $P_{\text{O}_2}$  ( $P_{\text{RMO}_2}$ ) and arterial  $P_{\text{O}_2}$  ( $P_{\text{aO}_2}$ ) in rainbow trout during exposure to changes in water  $P_{\text{O}_2}$  ( $P_{\text{wO}_2}$ ) during aquatic hypoxia (McKenzie et al., 2004).** Data are means  $\pm$  s.e.m.,  $N=6$  in all cases.

$P_{O_2}$  ( $P_{aO_2}$ ) minus  $P_{RMO_2}$ ; Fig. 2] (McKenzie et al., 2004). Nevertheless, muscle oxygen levels are high, and oxygen transfer to muscle may be maintained by a mechanism somewhat analogous to that seen in the swim bladder and eye of many teleost fishes. High oxygen levels in the eye and swim bladder are clearly associated with the Root effect, a reduction in Hb-O<sub>2</sub> carrying capacity with a decrease in pH (Pelster and Randall, 1998; Waser and Heisler, 2005). Acidification necessary to drive oxygen from the Hb comes from CO<sub>2</sub> entering the RBCs. Elevated CO<sub>2</sub> levels are produced at the swim bladder gas gland largely via the pentose phosphate shunt; CO<sub>2</sub> enters the RBCs, decreases pH, and drives oxygen from the Hb into the swim bladder (Pelster and Randall, 1998). The situation in the eye is not as clear. In rainbow trout, perfusion of the eye alone through the ophthalmic artery with rainbow trout blood is sufficient to generate high ocular oxygen levels, which are absent when perfused with mammalian blood lacking a Root effect (Waser and Heisler, 2005). The fish eye is poorly vascularised, yet it is a very active tissue with high rates of metabolic CO<sub>2</sub> production (Herbert et al., 2002; Wittenberg and Haedrich, 1974; Wittenberg and Wittenberg, 1962; Wittenberg and Wittenberg, 1974), including some via the pentose phosphate shunt (Bridges et al., 1998). Thus, CO<sub>2</sub> levels in the eye are probably high and, as the blood enters ocular circulation, a 'Root-off' shift may elevate retinal  $P_{O_2}$ . We suggest that oxygen delivery to muscle and perhaps other tissues may be enhanced in a similar way.

#### Carbonic anhydrase distribution, RBC pH and the Jacobs–Stewart cycle

Protons (H<sup>+</sup>) entering the RBC membrane via the Jacobs–Stewart cycle passively across the RBC membrane via the Jacobs–Stewart cycle. Protons combine with plasma bicarbonate and, in the presence of carbonic anhydrase (CA), are rapidly dehydrated to form CO<sub>2</sub>. Once formed, the CO<sub>2</sub> freely enters the RBCs, where it is rapidly hydrated via CA to form bicarbonate and protons; bicarbonate then leaves the cell in exchange for chloride (via Band III). CA is one of the fastest enzymes known, with an average half time ( $t_{1/2}$ ) of  $5 \times 10^{-3}$  to  $1 \times 10^{-3}$  s, approximately 6000 times faster than the uncatalyzed reaction (Cardenas et al., 1998; Geers and Gros, 2000; Henry and Swenson, 2000) and is in high concentration inside the RBCs and in

many other tissues (Decker et al., 1996; Effros and Weissman, 1979; Geers and Gros, 2000; Gervais and Tufts, 1998; Gilmour et al., 1997; Henry et al., 1997; Henry and Swenson, 2000; Sender et al., 1994; Siffert and Gros, 1982; Yamamoto et al., 1985). Teleost fish possess an assortment of CA isoforms, including both soluble and membrane-bound, and for many of these isoforms, tissue distribution and molecular structure are known (see reviews by Esbaugh and Tufts, 2006; Gilmour and Perry, 2009). However, less is known of the exact cellular distribution and function of each isoform. CA has been reported in the swim bladder of bowfin (Gervais and Tufts, 1998) and in fish muscle (for review, see Henry and Swenson, 2000). CAs are important in acid-base regulation in many sites including muscle, gills and kidney (Geers and Gros, 2000; Gilmour and Perry, 2009).

Teleost fish RBCs have sodium/proton exchange (NHE) isoforms and a Band III anion exchange (AE) protein that take up sodium and chloride and excrete protons and bicarbonate, respectively (Fig. 3) and are involved in volume regulation (Heming et al., 1986; Claiborne et al., 1999; Cossins and Gibson, 1997; Rummer and Brauner, 2011; Rummer et al., 2010; Weaver et al., 1999). Many teleost fishes also possess a  $\beta$ -adrenergically stimulated Na<sup>+</sup>/H<sup>+</sup> exchanger ( $\beta$ NHE) on the RBC membrane (Motais et al., 1992; Nikinmaa, 1992). Upon activation, the  $\beta$ NHE rapidly excretes protons from the RBC (Heming et al., 1987; Berenbrink and Bridges, 1994). CA activity is not available to plasma flowing through the gills and venous system of some, perhaps all, teleost fishes (Rahim et al., 1988; Gilmour et al., 1994; Perry et al., 1997). The absence of CA activity in the plasma will slow the Jacobs–Stewart cycle, because plasma bicarbonate dehydration will occur at an uncatalyzed slow rate ( $t_{1/2}$  ~25–90 s) (Cardenas et al., 1998; Geers and Gros, 2000; Henry and Swenson, 2000). Without plasma-accessible CA, the rate at which protons move from the plasma back into the RBC via the Jacobs–Stewart cycle will be reduced and the volume-regulating RBC NHE and AE systems will, therefore, be both pH- and volume-regulating systems (Fig. 3). Development of RBC pH regulation (e.g. via  $\beta$ NHE or NHE) in the absence of plasma CA uncouples plasma from RBC pH, thus reducing the effects of a large plasma acidosis on oxygen transport (Primmitt et al., 1986).

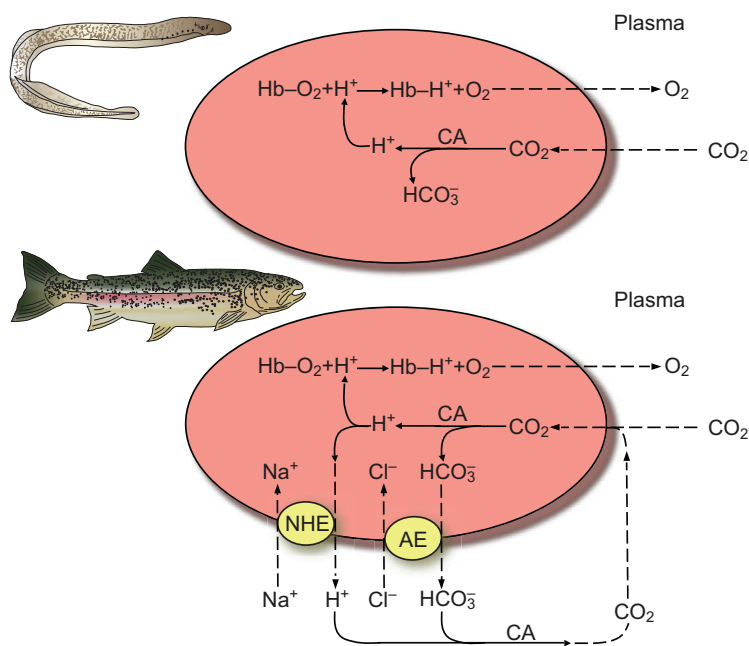

**Fig. 3. Red blood cells (RBCs) release oxygen to the tissues of lamprey (top) and rainbow trout (bottom).** The absence of RBC anion exchange (AE) in lamprey or plasma-accessible carbonic anhydrase (CA) in teleost fishes slows the movement of acid into the RBCs via the Jacobs–Stewart cycle. NHE refers to sodium proton exchange across the RBC membrane.



Plasma from some teleost fishes contains a CA-inhibiting factor (Haswell and Randall, 1976; Dimberg, 1994; Henry et al., 1997; Peters et al., 2000) that presumably prevents RBC pH regulation from being compromised if CA from lysed RBCs is released into the circulation (Henry et al., 1997). The inhibitor is a large molecule and has less effect on the activity of endothelial compared with cytosolic CA and probably cannot access CA bound to the sarcolemma membrane (see review by Geers and Gros, 2000). Although lysed CA will be excreted, it is possible that rapid inhibition of lysed CA is required to maintain blood capillary micro-environments involved in acid and/or bicarbonate transfer.

Nikinmaa et al. (Nikinmaa et al., 1990) reported an inhibition of the  $\beta$ NHE induced RBC pH increase *in vitro* when CA was added to the bathing medium whereas Motais et al. (Motais et al., 1989) reported no effect of increased plasma CA activity on  $\beta$ NHE-activated RBC pH. Nikinmaa et al. (Nikinmaa et al., 1990), however, still observed a drop in extracellular pH despite observing no change in RBC pH. Presumably there was a net proton efflux from the RBC, but the measurement of RBC pH was not sensitive enough to detect the change. The studies of Nikinmaa et al. (Nikinmaa et al., 1990), Motais et al. (Motais et al., 1989) and others stress the importance of slow uncatalyzed plasma bicarbonate dehydration in the regulation of RBC pH. These studies highlight the importance of the circulation of the blood in the generation of this response. The blood resides for approximately 60 s in the venous circulation with no loss or gain of  $\text{CO}_2$ . A  $\beta$ NHE-induced RBC pH increase in venous blood will increase oxygen binding to the Hb and lower  $P_{\text{VO}_2}$ , thus enhancing oxygen uptake as blood flows through the gills. Once blood enters the gills,  $\text{CO}_2$  will be lost from the blood, maintaining high RBC pH.

Many factors in addition to  $\beta$ NHE activation may be involved in trout RBC pH regulation *in vivo*. Lessard et al. (Lessard et al., 1995) continuously infused CA into intact trout over a 6-h period but observed no short-circuiting of the catecholamine-induced RBC pH regulation (e.g. via  $\beta$ NHE). Changes in organic phosphates, carbamino formation or cell volume may have altered RBC membrane potential and therefore the distribution of protons between the RBC and plasma (Hemming et al., 1986). Swietach et al. (Swietach et al., 2010) showed that human RBC pH disturbances were compensated for within minutes when AE was activated in adult RBCs, with the possible involvement of NHE in immature RBCs. The teleost RBC is nucleated and regulation of intracellular pH may be similar to that of many other eukaryotic cells (Boron, 2004), where activation of NHE and AE results in acid efflux and acid-equivalent influx, respectively. A 'housekeeping' NHE has been reported in rainbow trout RBCs and may serve this purpose (Rummer and Brauner, 2011). While the exact NHE isoform is still unknown, the term 'housekeeping' will be used to refer to any fish RBC NHE other than  $\beta$ NHE.

The absence of plasma-accessible CA in the gills and veins of teleost fishes (Rahim et al., 1988; Gilmour et al., 1994; Perry et al., 1997) also results in nearly all bicarbonate dehydration associated with  $\text{CO}_2$  excretion occurring inside the RBCs, where CA activity is high. Hb oxygenation produces the protons that drive bicarbonate dehydration inside the RBCs, resulting in tight coupling between  $\text{O}_2$  and  $\text{CO}_2$  transfer (Brauner et al., 2000). This tight coupling is further enhanced by a reduction in Hb buffering capacity due to a reduction in the number of histidine residues associated with teleost Hb compared with other vertebrate Hbs. Thus, fewer protons are bound to histidine residues and more are available to couple  $\text{O}_2$  and  $\text{CO}_2$  transfer. Berenbrink et al. (Berenbrink et al., 2005) presented an elegant review of the evolution of vertebrate Hbs, concentrating on

the relationship between the number of histidine side chains, specific buffer values and the magnitude of the Bohr coefficient. They point out that lamprey and many teleosts have a low Hb buffer value when compared with other vertebrates, which is related to a reduction in the number of histidine residues. The absence of either plasma-accessible CA (teleosts) or Band III AE protein [lamprey (Nikinmaa, 1997; Tufts, 1992)] aids in uncoupling RBC and plasma pH by slowing the Jacobs–Stewart cycle, and both have a low Hb buffering capacity.

### Bohr/Root effect Hbs

Most teleost fishes possess Root effect Hbs, where a reduction in blood pH not only decreases the Hb– $\text{O}_2$  affinity (Bohr effect) but also dramatically reduces Hb– $\text{O}_2$  carrying capacity (Root effect). Because of the high pH sensitivity of Root effect Hbs, a pH change could increase blood  $P_{\text{O}_2}$  in fish by 2.5–25 times that possible in terrestrial vertebrates with Hbs that only possess a Bohr effect (Rummer and Brauner, 2011; Rummer et al., 2013). The general model in mammalian systems for pH- and/or  $\text{CO}_2$ -induced enhancement of  $\text{O}_2$  delivery involves  $\text{CO}_2$  diffusing quickly into the RBCs and producing protons via the CA-mediated  $\text{CO}_2$  hydration reaction. In mammalian RBCs, both  $\text{CO}_2$  and  $\text{H}^+$  will bind to the Hb, which will reduce Hb– $\text{O}_2$  affinity and enhance  $\text{O}_2$  delivery to the tissues (Bohr effect). Lapennas (Lapennas, 1983) suggested an optimal Bohr coefficient (change in  $\log P_{\text{O}_2}$  with a change in pH) for  $\text{O}_2$  delivery, but the general conclusion was that the only organisms that actually possessed 'optimal Bohr coefficients' were air-breathing vertebrates. Furthermore, under Lapennas' analysis, it appeared that fish blood is not optimized for general  $\text{O}_2$  delivery, and the large Bohr coefficient associated with the Root effect might even impair oxygen delivery. However, Lapennas' analysis assumed steady-state conditions within the blood (Lapennas, 1983). This is not the case in teleost blood. We suggest that this large Bohr coefficient associated with the Root effect Hb is important in oxygen delivery to the tissues in teleost fish.

### $\text{CO}_2$ excretion and tissue oxygenation

The majority of  $\text{CO}_2$  excreted across the gills originates as bicarbonate in the plasma that enters the RBCs, where it is dehydrated by CA to form  $\text{CO}_2$  (Brauner et al., 2000). Therefore, the rate-limiting step for  $\text{CO}_2$  excretion across the gills is bicarbonate entry into the RBCs (Gilmour, 1998; Perry and Gilmour, 1993). Transit time for blood flowing through the gills is of the order of  $\sim 1$  s, which is insufficient for bicarbonate dehydration in the plasma at an uncatalyzed rate ( $t_{1/2} \sim 25$ – $90$  s) (Cardenas et al., 1998; Geers and Gros, 2000; Henry and Swenson, 2000). Excess bicarbonate, therefore, will be left behind in the plasma leaving the gills. In addition,  $\text{CO}_2$  released from the tissues will end up as bicarbonate in the venous plasma while protons are bound to Hb. Even if CA is available to plasma perfusing capillaries (see below), bicarbonate disequilibria can still develop within the venous system. This will occur as the rate of RBC bicarbonate transport (via Band III) is slower than capillary transit time, and CA is not plasma-accessible within the venous system, as is the situation in teleost fishes. Perry et al. (Perry et al., 1997) observed bicarbonate disequilibrium states in the venous circulation of unstressed fish that were less than that observed in the arterial blood, which may have been a reflection of venous residence time ( $\sim 60$  s, sufficient time for significant bicarbonate dehydration at an uncatalysed rate) compared with that in the arterial system ( $\sim 10$  s). Because an extracorporeal loop was used for this analysis, the reported magnitudes of both venous and arterial disequilibria are probably underestimates. Finally, venous disequilibrium states may be further enhanced in stressed fish when

both bicarbonate and  $H^+$  are actively excreted from the RBCs via  $\beta$ NHE. Perry et al. (Perry et al., 1997) eliminated bicarbonate disequilibria in both arterial and venous plasma by infusion of CA, confirming that the disequilibria were related to the absence of accessible CA.

Unlike the situation in the venous and gill circulations, there is evidence for endothelial-bound, plasma-accessible CA embedded in the peripheral circulation (for general review, see Geers and Gros, 2000). Henry et al. (Henry et al., 1997) and Wang et al. (Wang et al., 1998) reported that there was extracellular CA activity in trout white muscle, and concluded, based on the earlier work of Geers et al. (Geers et al., 1985), that it was associated with the sarcolemma membrane rather than the vascular endothelium. Despite this location, it has been shown that plasma bicarbonate has access to this CA, at least in mammals (see review by Geers and Gros, 2000). CA-like immunoreactivity has been located in the arteries of the glass catfish (Fig. 4) using a CA (Abcam ab6621-5) polyclonal antibody raised against whole-molecule human erythrocyte CAII.

The supplier states that this antibody has negative cross-reactivity with human CAI, but other isoforms have not been tested. Although positive cross-reactivity has been demonstrated with green spotted pufferfish and zebrafish CA, the specific isoform cross-reactivity was not determined (Tang and Lee, 2007; J.M.W., unpublished). The data presented in Fig. 4 are preliminary, and indeed, a higher-resolution technique such as immunogold would help to identify the exact sub-cellular localization of the CA-like staining and its plasma accessibility. Additionally, isoform-specific antibodies should also be used (i.e. CAIV) to determine the molecular identity of the dorsal aortic CA isoform. Gilmour et al. (Gilmour et al., 1994) reported marked bicarbonate disequilibria in blood withdrawn from the coeliac artery of rainbow trout, indicating the absence of plasma-accessible CA activity in this vessel and the dorsal aorta, at least between the gills and the point of origin of the coeliac artery. Endothelial surface area to plasma volume ratios increase as vessels get smaller, and thus the effects of endothelial-bound, plasma-accessible CA may become apparent only in smaller vessels. We

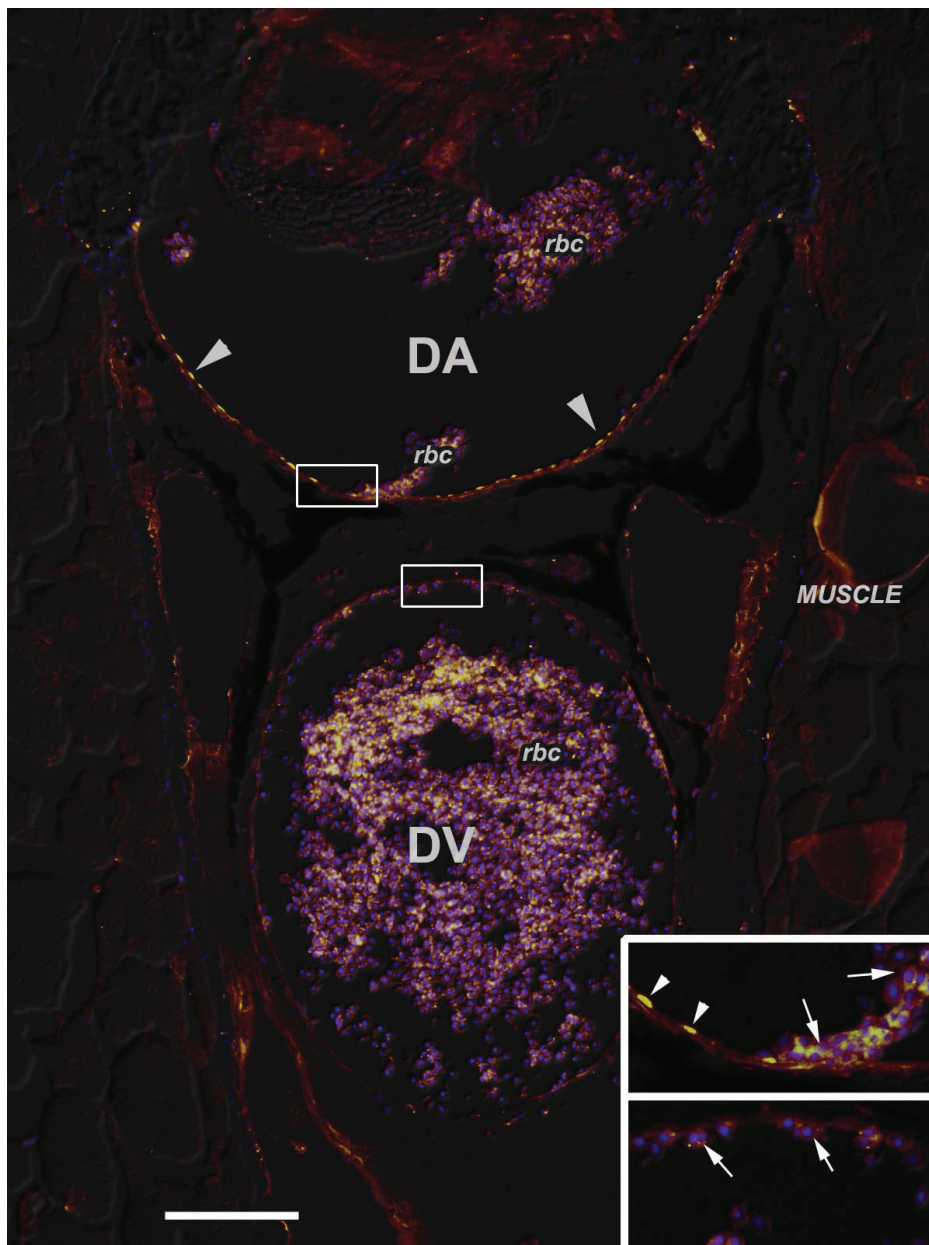

**Fig. 4. Discontinuous immunofluorescent staining of CA in the dorsal aortic (DA) endothelium (arrowheads) is not apparent in the dorsal vein (DV) endothelium of the glass catfish.** Red blood cells are indicated by arrows or labeled 'rbc'. Higher magnification (4 $\times$ ) insets are provided of DA and DV. Sections were indirectly probed with a heterologous CAII antibody and counter-stained with DAPI (blue) for labelling nuclei and the differential interference contrast image overlaid for tissue orientation. Scale bar, 100  $\mu$ m and 400  $\mu$ m for insets.

suggest that CA might be located in smaller arteries close to tissue capillaries. Although the distribution of endothelial CA has been studied in only a few teleost species, there is some preliminary evidence of CA bound to arterial endothelial cells, oriented toward the plasma (Fig. 4). Unfortunately, a more detailed distribution pattern is not yet available. However, because the presence or absence of plasma-accessible CA in the circulation could play a dramatic role in oxygen delivery to various teleost tissues, this is an area worthy of further investigation.

As suggested earlier, elevated plasma bicarbonate encountering plasma-accessible CA will be rapidly dehydrated to form  $\text{CO}_2$ , enter the RBCs and be hydrated to form protons. The protons will bind to Hb, increase  $P_{\text{aO}_2}$  and enhance oxygen diffusion into the tissues. This has been demonstrated in an *in vitro* closed system using rainbow trout blood incubated at elevated  $P_{\text{CO}_2}$  to increase plasma bicarbonate. The whole blood was acidified, adrenergically stimulated and exposed to CA (Rummer and Brauner, 2011). The increase in  $P_{\text{O}_2}$  following the addition of CA was as much as 30 mmHg. In addition, activation of  $\beta\text{NHE}$  on the RBC membrane could further enhance tissue oxygenation, presumably by enhancing the plasma bicarbonate disequilibrium. *In vitro*, the increase in rainbow trout blood  $P_{\text{O}_2}$  observed upon acidification,  $\beta$ -adrenergic stimulation and then exposure to CA was much smaller when  $\beta$ -adrenergic stimulation was omitted from the experimental series (Rummer and Brauner, 2011). This indicates that activation of  $\beta\text{NHE}$  may further enhance tissue oxygenation during stressful situations when catecholamine levels are elevated. Furthermore, non-specific inhibition of NHE completely eliminated the response (Rummer and Brauner, 2011), suggesting that a 'housekeeping' NHE may play a role under conditions when catecholamine levels are low. Rummer et al. (Rummer et al., 2013) further supported this concept when they exposed resting rainbow trout to elevated environmental  $\text{CO}_2$ , which presumably resulted in an increase in the plasma bicarbonate disequilibrium in arterial blood. The presumed subsequent acidification of the RBC resulted in an increase in  $P_{\text{RMO}_2}$  of over 30 mmHg, which was completely eliminated by the addition of a membrane-impermeant CA inhibitor (C18, i.e. inhibiting only plasma-accessible isoforms; Fig. 5), thus demonstrating the importance of plasma-accessible CA to this process (Fig. 6).

Rummer et al. (Rummer et al., 2013) found that infusing a CA inhibitor that blocks only plasma-accessible CA (C18) tended to reduce  $P_{\text{RMO}_2}$  in resting rainbow trout, but the decrease was not statistically significant; that is, the effects of endothelial CA may be minimal during rest. It is also possible that plasma bicarbonate

dehydration is limited by proton availability, and oxygen delivery is enhanced by plasma acidosis, e.g. following burst swimming. Under stressful conditions, the release of catecholamines via activation of RBC  $\beta\text{NHE}$  could enhance plasma bicarbonate disequilibrium and augment oxygen delivery to the tissues. In addition, a  $\beta\text{NHE}$ -induced rise in venous RBC pH would increase Hb- $\text{O}_2$  binding and reduce  $P_{\text{vO}_2}$ , which in turn would enhance oxygen uptake at the gills.

A number of investigations other than those by Rummer and colleagues (Rummer and Brauner, 2011; Rummer et al., 2013) have looked at the effects of CA infusion in intact fish. Wood and Munger (Wood and Munger, 1994) infused resting rainbow trout with CA and observed a reduction in blood total  $\text{CO}_2$  and  $P_{\text{aCO}_2}$  and an increase in plasma pH, consistent with an increase in  $\text{CO}_2$  excretion from plasma. The much larger increase in  $P_{\text{aCO}_2}$  and decrease in plasma pH following exhaustive exercise in saline-infused versus CA-infused rainbow trout could reflect differences in the extent of arterial plasma bicarbonate disequilibrium and tissue oxygen delivery. Wood and Munger (Wood and Munger, 1994) observed greater increases in oxygen uptake with little change in  $P_{\text{aCO}_2}$  in saline-infused versus CA-infused fish. Wood and Munger (Wood and Munger, 1994) also reported that CA infusion did not reduce aerobic swimming performance, indicating that either oxygen delivery was not reduced by CA infusion or oxygen transfer is not the rate-limiting step in aerobic performance. However, these swimming tests lasted several hours, sufficient time for small proteins such as CA (~29 kDa) to be filtered by the glomerulus and lost in the urine. Blood oxygen content was unaffected by CA infusion in intact trout (Lessard et al., 1995), but there was an expected reduction in  $\text{CO}_2$  content of the blood. Surprisingly, the decrease in  $\text{CO}_2$  content and plasma pH following exhaustive exercise was reduced compared with that observed in saline-infused fish, perhaps because of reduced acid excretion from the muscle in the CA-infused exhausted fish. The work of Wood and Munger (Wood and Munger, 1994) and Lessard et al. (Lessard et al., 1995) neither support nor refute our model of tissue oxygen delivery, nor were they designed to test our hypothesis.

### Species variations in tissue oxygenation

The model we describe for enhanced oxygen delivery is likely to vary between species and during development, and it is likely less important in those animals with a reduced Hb pH sensitivity. Hbs vary in their pH sensitivity, and the complement of Hbs can change with age of the fish (Giles and Vanstone, 1976; Rummer et al., 2010). Some teleost species have lost RBC  $\beta\text{NHE}$  activation

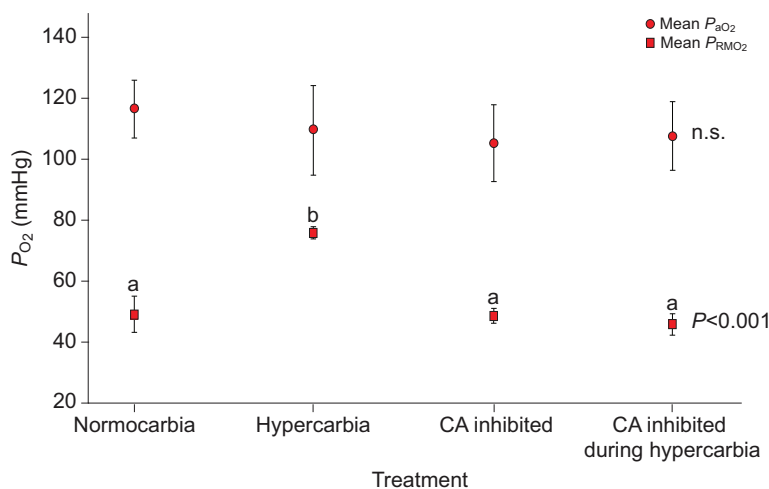

**Fig. 5. Changes in  $P_{\text{RMO}_2}$  and  $P_{\text{aO}_2}$  in rainbow trout during periods of aquatic hypercarbia with and without CA inhibition.** Data are means  $\pm$  s.e.m., and statistically significant differences are demarcated by different letters, if applicable, otherwise n.s. (not significant),  $N=7-11$  (for details, see Rummer et al., 2013).



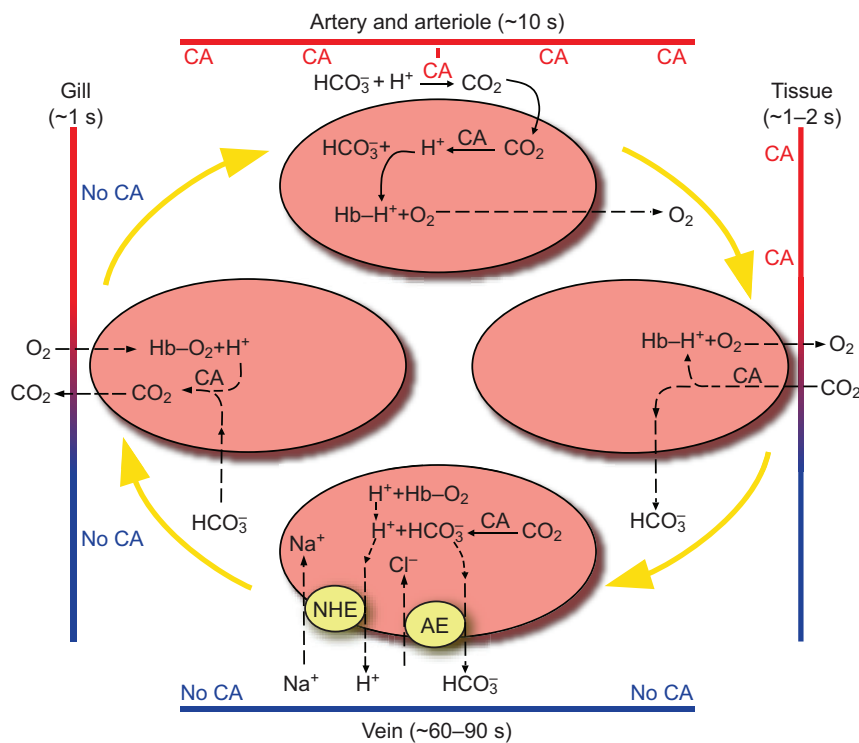

**Fig. 6. The transfer of oxygen, carbon dioxide, protons and bicarbonate between the plasma and RBCs as blood flows through the gills, arteries, tissues and venous circulation.** The approximate transit time (s) for blood through these portions of the circulation is in brackets. There is no CA available to plasma in the gills and veins, but CA is available in the arteries and arterioles. NHE, sodium proton exchange; AE, anion exchange.

(Romero et al., 1996; Rummer et al., 2010; Weaver et al., 1999), and this occurs in species that have lost or exhibit a minimal Root effect (Berenbrink et al., 2005; Rummer et al., 2010). The loss of RBC  $\beta$ NHE activation may be related to requirements for RBC volume regulation. RBC NHEs are involved in volume increase as well as pH regulation, and the response varies between species. Rainbow trout RBC NHE responds to adrenergic stimulation but not to reduced volume, whereas eel NHE responds to reduced volume, and flounder NHE shows adrenergic, hypertonic and acid activation (Weaver et al., 1999). High oxygen levels inhibit trout, carp and flounder RBC NHEs, but RBC membrane  $K^+Cl^-$  co-transporters (KCC) decrease volume and are activated by oxygenation. Teleost RBC AE has the potential via KCC activation to modulate volume as well as RBC pH. Swietach et al. (Swietach et al., 2010) showed that human RBC pH regulation is modulated by changes in RBC volume. The physiological role of these membrane ion exchangers in RBC pH-volume coupling in teleost fishes and the consequences on both blood rheology and gas transport are not clear, but are worthy of further investigation and may explain varying patterns of oxygen transfer in teleost fishes.

#### Tissue oxygenation in elasmobranchs, lampreys and hagfish

Elasmobranchs have CA embedded in the gill pillar cells and in the plasma, both available for plasma bicarbonate dehydration, but overall CA activity levels are less than those observed in teleosts (Swenson and Maren, 1987; Gilmour et al., 1997; Gilmour and Perry, 2009; Gilmour et al., 2001; Perry et al., 1999; Wilson et al., 2000). At the gills,  $CO_2$  can be excreted directly from the plasma and there is no tight coupling of  $O_2$  and  $CO_2$  transfer through the RBCs, as in teleost fishes. Swenson and Maren (Swenson and Maren, 1987) concluded that gill CA was important in acid-base regulation rather than  $CO_2$  excretion. As far as we know, there are no reports of changes in RBC organic phosphate levels during hypoxia, and tissue oxygen levels have not been measured in any elasmobranch. Spiny dogfish sharks show no RBC  $\beta$ NHE pH

regulation and no plasma bicarbonate disequilibria [see discussion in Randall (Randall, 1998)]. Dogfish Hbs also have more histidine residues and therefore a greater buffer value than teleost Hbs (Berenbrink et al., 2005). Elasmobranchs do produce lactate and become acidotic following burst swimming (Holeton and Heisler, 1983). These plasma pH changes will be transferred to the RBCs, but elasmobranch Hbs have a high buffer value and reduced Bohr coefficients (Berenbrink et al., 2005). Brill et al. observed no change in RBC pH following anaerobic exercise in the sandbar shark (Brill et al., 2008). It would seem that the mechanisms of oxygen delivery to the tissues between teleosts and elasmobranchs differ, and this is related to the distribution of plasma-accessible CA and Hb buffering capacity.

Lampreys and hagfish both lack chloride/bicarbonate exchange on their RBC membranes (Fig. 3), but only lamprey RBCs have sodium/proton exchange (Nikinmaa, 1997; Tufts, 1992). In the lamprey,  $CO_2$  is hydrated to bicarbonate and transported within the RBCs. Once reaching the gills, bicarbonate is dehydrated within the RBCs and released at the gills as  $CO_2$ . Hagfish have CA available to plasma passing through the gills, and plasma bicarbonate is excreted directly from the plasma as  $CO_2$  (Esbaugh et al., 2009). Thus, in the lamprey,  $CO_2$  transport is centred entirely on the RBCs, whereas elasmobranchs and hagfish can excrete plasma bicarbonate directly from plasma as  $CO_2$  without it first passing through the RBCs.

#### Evolution of tissue oxygen delivery in teleosts

Approximately 400 MYA, Root effect Hbs probably evolved in basal actinopterygian fishes. It has been argued that in those ancient fish that possessed a Root effect, the onset of the 'Root-off' shift occurred at a pH much lower than that expected to occur in the general circulation and, therefore, Hb oxygenation would not likely be impaired (Regan and Brauner, 2010a; Regan and Brauner, 2010b; Rummer et al., 2010). These Hbs were likely selected for oxygen delivery, as their Bohr coefficients were close to the optimal values proposed by Lappenas (Berenbrink et al., 2005).

Over the next 100 million years, RBC pH regulation, coupled to the absence of plasma-accessible CA, evolved and ameliorated the effects of a plasma acidosis on Hb oxygenation. This loss of plasma-accessible CA slowed the Jacobs–Stewart cycle and the transfer of acid between plasma and the RBCs via AE and ‘housekeeping’ NHE transport proteins on the RBC membrane. With the uncoupling of plasma and RBC pH, the importance of Hb as a buffer diminished and led to a reduction in Hb buffering (Berenbrink et al., 2005; Regan and Brauner, 2010a; Regan and Brauner, 2010b), thus enhancing the tight coupling of O<sub>2</sub> and CO<sub>2</sub> transfer through the RBCs (Brauner et al., 2000). Many extant teleosts are able to regulate RBC pH and have Root effect Hbs that operate at physiological pH. Presumably, as the capacity to regulate RBC pH evolved, the magnitude of the Root effect increased and the pH onset moved into the pH range of that in the general circulation. We stress, however, that it is the large Bohr coefficient [greater than that deemed optimal by Lapennas (Lapennas, 1983)] associated with Root effect Hbs that is important for oxygen delivery to tissues (other than the eye and swim bladder) in teleost fishes. Such Hbs appear to exist in both teleosts and bowfin, indicating that the evolution of this system occurred in a common ancestor of bowfin and teleosts, before the late Permian.

Plasma disequilibrium states for CO<sub>2</sub> hydration/dehydration reactions occurred resulting from the pattern of CO<sub>2</sub> excretion across the gills and tissues. Plasma-accessible CA embedded in arterial endothelial cells eliminated bicarbonate disequilibria and generated CO<sub>2</sub> that moved into the RBCs, thus elevating P<sub>aO<sub>2</sub></sub> in the blood and enhancing tissue oxygenation. Mechanisms to reduce RBC NTP during hypoxia evolved, which increased Hb–O<sub>2</sub> affinity without compromising tissue oxygen delivery (note: this could have occurred much later).

The absence of plasma-accessible CA activity created conditions for the subsequent evolution of RBC pH regulation via βNHE. Berenbrink et al. (Berenbrink et al., 2005) concluded that RBC pH regulation involving βNHE evolved in the late Jurassic, some 250 million years after the appearance of Root effect Hbs (Fig. 1). Oxygen delivery to the eye and swim bladder clearly depends on the Root effect (Pelster and Randall, 1998; Waser and Heisler, 2005), but cannot be related to catecholamine-stimulated RBC βNHE pH regulation, which is inhibited by high oxygen levels (Gibson et al., 2000; Weaver et al., 1999). In fact, the choroid rete in the eye evolved in the late Permian (Berenbrink et al., 2005), before the appearance of βNHE pH regulation (Berenbrink et al., 2005). Furthermore, high ocular oxygen levels have been measured in the absence of catecholamines (Waser and Heisler, 2005). Catecholamines reduce blood flow to the gas gland, therefore inhibiting oxygen secretion into the swim bladder (Pelster, 1994). Finally, eels lack RBC βNHE pH regulation but deliver high levels of oxygen to their swim bladder (Weaver et al., 1999). Thus, catecholamine-activated RBC βNHE pH regulation is not directly involved in developing the high oxygen levels seen in the eye and swim bladder. We suggest that catecholamine-activated RBC βNHE pH regulation enhances oxygenation of tissues other than the eye and swim bladder, as well as protects RBC pH from a plasma acidosis such that O<sub>2</sub> uptake at the gills is safeguarded.

The CA-mediated oxygen delivery system evolved further with the appearance of acid-producing gas glands that enhanced oxygen transfer into the swim bladder of some fishes. This may have been associated with the appearance of a rete mirabile at the swimbladder in the early Cretaceous (Berenbrink et al., 2005). Tuna and some other fish have evolved counter-current circulation to muscle to retain heat and warm the muscles. Given an appropriate distribution

of endothelia-bound CA, this counter-current circulation could also be used to raise muscle oxygen levels; the two systems need not be mutually exclusive.

In conclusion, we suggest that blood leaving the tissues and the gills of at least some teleost fishes has elevated plasma bicarbonate levels due to a disequilibrium state. The bicarbonate is dehydrated to form CO<sub>2</sub> as blood encounters plasma-accessible CA bound to arterial and/or capillary endothelial cells. The CO<sub>2</sub> enters and acidifies the RBC and drives oxygen from Hb into the muscle and perhaps other tissues. During exercise, stress or adverse environmental conditions, this process is enhanced by RBC βNHE activation. Oxygen transfer to the tissues depends on C<sub>aO<sub>2</sub></sub> and the magnitude of the combined Bohr/Root effect to enhance the oxygen gradient. This allows for the selection of mechanisms, in particular, increased Hb–O<sub>2</sub> affinity, to enhance uptake from the environment to maintain C<sub>aO<sub>2</sub></sub> during hypoxia, but without impairing oxygen delivery to the tissues.

We propose that the evolution of this mode of tissue oxygen transfer facilitated teleost radiation in the Triassic and Jurassic periods, when oxygen levels were low (Fig. 1). Radiation was also associated with the evolution of novel feeding mechanisms, buoyancy control and increased swimming abilities, thus widening food sources for these active, agile hunters (Near et al., 2012; Ilves and Randall, 2007; Helfman et al., 1997). With increasing activity and mobility, muscle density also increased. We suggest that the above advances hinged on enhanced O<sub>2</sub> transfer from the water to the tissues via a pH-sensitive Hb and CA-mediated oxygen delivery system unique to teleost fishes.

#### Acknowledgements

The authors thank M. D. Regan and T. Harter for reading several versions of this review and for their helpful suggestions.

#### Competing interests

The authors declare no competing financial interests.

#### Author contributions

D.J.R. is responsible for most of the written text, but all authors contributed to the ideas presented.

#### Funding

J.L.R. is supported by an Australian Research Council (ARC) Super Science Fellowship and the ARC Centre of Excellence for Coral Reef Studies, and C.J.B. is supported by a Natural Sciences and Engineering Research Council of Canada Discovery grant.

#### References

- Bellwood, D. and Hoey, A. (2004). Mesozoic fishes 3: systematics, paleoenvironments and biodiversity. In *Mesozoic Fishes* (ed. G. Arratia and A. Tintori), pp. 639–649. Munchen, Germany: Verlag.
- Berenbrink, M. and Bridges, C. (1994). Catecholamine-activated sodium/proton exchange in the red blood cells of the marine teleost *Gadus morhua*. *J. Exp. Biol.* **192**, 253–267.
- Berenbrink, M., Koldkjaer, P., Kepp, O. and Cossins, A. R. (2005). Evolution of oxygen secretion in fishes and the emergence of a complex physiological system. *Science* **307**, 1752–1757.
- Booth, J. H. (1978). The distribution of blood flow in the gills of fish: Application of a new technique to rainbow trout (*Salmo gairdneri*). *J. Exp. Biol.* **73**, 119–129.
- Boron, W. F. (2004). Regulation of intracellular pH. *Adv. Physiol. Educ.* **28**, C844–C856.
- Brauner, C. J., Thorarensen, H., Gallagher, P., Farrell, A. P. and Randall, D. J. (2000). The interaction between O<sub>2</sub> and CO<sub>2</sub> in the blood of rainbow trout (*Oncorhynchus mykiss*) during graded sustained exercise. *Respir. Physiol.* **119**, 83–96.
- Bridges, C. R., Berenbrink, M., Muller, R. and Waser, W. (1998). Physiology and biochemistry of the pseudobranch: an unanswered question? *Comp. Biochem. Physiol.* **119**, 67–77.
- Brill, R., Bushnell, P., Schroff, S., Seifert, R. and Galvin, M. (2008). Effects of anaerobic exercise accompanying catch-and-release fishing on blood-oxygen affinity of the sandbar shark (*Carcharhinus plumbeus*, Nardo). *J. Exp. Mar. Biol. Ecol.* **354**, 132–143.
- Bushnell, P. G. and Brill, R. W. (1992). Oxygen transport and cardiovascular responses in skipjack tuna (*Katsuwonus pelamis*) and yellowfin tuna (*Thunnus albacares*) exposed to acute hypoxia. *J. Comp. Physiol. B* **162**, 131–143.



- Cardenas, V., Jr, Heming, T. A. and Bidani, A. (1998). Kinetics of CO<sub>2</sub> excretion and intravascular pH disequilibria during carbonic anhydrase inhibition. *J. Appl. Physiol.* **84**, 683-694.
- Clack, J. A. (2007). Devonian climate change, breathing, and the origin of the tetrapod stem group. *Integr. Comp. Biol.* **47**, 510-523.
- Claiborne, J. B., Blackston, C. R., Choe, K. P., Dawson, D. C., Harris, S. P., Mackenzie, L. A. and Morrison-Shetlar, A. I. (1999). A mechanism for branchial acid excretion in marine fish: identification of multiple Na<sup>+</sup>/H<sup>+</sup> antiporter (NHE) isoforms in gills of two seawater teleosts. *J. Exp. Biol.* **202**, 315-324.
- Cossins, A. and Gibson, J. (1997). Volume-sensitive transport systems and volume homeostasis in vertebrate red blood cells. *J. Exp. Biol.* **200**, 343-352.
- Decker, B., Sender, S. and Gros, G. (1996). Membrane-associated carbonic anhydrase IV in skeletal muscle: subcellular localization. *Histochem. Cell Biol.* **106**, 405-411.
- Dimberg, K. (1994). The carbonic anhydrase inhibitor in trout plasma: purification and its effect on carbonic anhydrase activity and the Root effect. *Fish Physiol. Biochem.* **12**, 381-386.
- Effros, R. M. and Weissman, M. L. (1979). Carbonic anhydrase activity of the cat hind leg. *J. Appl. Physiol.* **47**, 1090-1098.
- Esbaugh, A. J., Gilmour, K. M. and Perry, S. F. (2009). Membrane-associated carbonic anhydrase in the respiratory system of the Pacific hagfish (*Eptatretus stouti*). *Respir. Physiol. Neurobiol.* **166**, 107-116.
- Esbaugh, A. J. and Tufts, B. L. (2006). The structure and function of carbonic anhydrase isozymes in the respiratory system of vertebrates. *Respir. Physiol. Neurobiol.* **154**, 185-198.
- Geers, C. and Gros, G. (2000). Carbon dioxide transport and carbonic anhydrase in blood and muscle. *Physiol. Rev.* **80**, 681-715.
- Geers, C., Gros, G. and Gartner, A. (1985). Extracellular carbonic anhydrase of skeletal associated with the sarcolemma. *J. Appl. Physiol.* **59**, 548-558.
- Gervais, M. and Tufts, B. (1998). Evidence for membrane-bound carbonic anhydrase in the air bladder of bowfin (*Amia calva*), a primitive air-breathing fish. *J. Exp. Biol.* **201**, 2205-2212.
- Gibson, J., Cossins, A. and Ellory, J. (2000). Oxygen-sensitive membrane transporters in vertebrate red cells. *J. Exp. Biol.* **203**, 1395-1407.
- Giles, M. A. and Vanstone, W. E. (1976). Ontogenetic variation in the multiple hemoglobins of coho salmon (*Oncorhynchus kisutch*) and effect of environmental factors on their expression. *J. Fish. Res. Board Can.* **33**, 1144-1149.
- Gilmour, K. M. (1998). The disequilibrium pH: a tool for the localization of carbonic anhydrase. *Comp. Biochem. Physiol.* **119**, 243-254.
- Gilmour, K. M., Henry, R. P., Wood, C. M. and Perry, S. F. (1997). Extracellular carbonic anhydrase and an acid-base disequilibrium in the blood of the dogfish (*Squalus acanthias*). *J. Exp. Biol.* **200**, 173-183.
- Gilmour, K. M. and Perry, S. F. (2009). Carbonic anhydrase and acid-base regulation in fish. *J. Exp. Biol.* **212**, 1647-1661.
- Gilmour, K. M., Randall, D. J. and Perry, S. F. (1994). Acid-base disequilibrium in the arterial blood of rainbow trout (*Oncorhynchus mykiss*). *Respir. Physiol.* **96**, 259-272.
- Graham, J. B. (1997). *Air-Breathing Fishes: Evolution, Diversity and Adaptation*. Waltham, MA: Academic Press.
- Haswell, M. S. and Randall, D. J. (1976). Carbonic anhydrase inhibitor in trout plasma. *Respir. Physiol.* **28**, 17-27.
- Helfman, G. S., Collette, B. B. and Facey, D. E. (1997). *The Diversity of Fishes*. Oxford: Blackwell.
- Heming, T. A., Randall, D. J., Boutilier, R. G., Iwama, G. K. and Primmett, D. (1986). Ionic equilibria in red blood cells of rainbow trout (*Salmo gairdneri*): Cl<sup>-</sup>, HCO<sub>3</sub><sup>-</sup> and H<sup>+</sup>. *Respir. Physiol.* **65**, 223-234.
- Heming, T. A., Randall, D. J. and Mazeaud, M. M. (1987). Effects of adrenaline on ionic equilibria in red blood cells of rainbow trout (*Salmo gairdneri*). *Fish Physiol. Biochem.* **3**, 83-90.
- Henry, R. P. and Swenson, E. R. (2000). The distribution and physiological significance of carbonic anhydrase in vertebrate gas exchange organs. *Respir. Physiol.* **121**, 1-12.
- Herbert, N. A., Wells, R. M. G. and Baldwin, J. (2002). Correlates of choroid rete development with the metabolic potential of various tropical reef fish and the effect of strenuous exercise on visual performance. *J. Exp. Mar. Biol. Ecol.* **275**, 31-46.
- Holeton, G. and Heisler, N. (1983). Contribution of net ion transfer mechanisms to acid-base regulation after exhausting activity in the larger spotted dogfish (*Scyliorhinus stellaris*). *J. Exp. Biol.* **103**, 31-46.
- Holeton, G. F. and Randall, D. J. (1967). The effect of hypoxia upon the partial pressure of gases in the blood and water afferent and efferent to the gills of rainbow trout. *J. Exp. Biol.* **46**, 317-327.
- Houston, A. H. (1985). Erythrocytic magnesium in freshwater fishes. *Magnesium* **4**, 106-128.
- Ivles, K. L. and Randall, D. J. (2007). Why have primitive fishes survived? In *Primitive Fishes (Fish Physiology, Vol. 26)* (ed. D. J. McKenzie, C. J. Brauner and A. P. Farrell), pp. 516-536. San Diego, CA: Academic Press, Elsevier.
- Lapennas, G. N. (1983). The magnitude of the Bohr coefficient: optimal for oxygen delivery. *Respir. Physiol.* **54**, 161-172.
- Lessard, J., Val, A. L., Aota, A. and Randall, D. J. (1995). Why is there no carbonic anhydrase activity available to fish plasma? *J. Exp. Biol.* **198**, 31-38.
- Matey, V., Richards, J. G., Wang, Y., Wood, C. M., Rogers, J., Davies, R., Murray, B. W., Chen, X.-Q., Du, J. and Brauner, C. J. (2008). The effect of hypoxia on gill morphology and ionoregulatory status in the Lake Qinghai scaleless carp, *Gymnocypris przewalskii*. *J. Exp. Biol.* **211**, 1063-1074.
- McKenzie, D. J., Wong, S., Randall, D. J., Egginton, S., Taylor, E. W. and Farrell, A. P. (2004). The effects of sustained exercise and hypoxia upon oxygen tensions in the red muscle of rainbow trout. *J. Exp. Biol.* **207**, 3629-3637.
- Motais, R., Borgese, F., Fievet, B. and Garcia-Romeu, F. (1992). Regulation of Na<sup>+</sup>/H<sup>+</sup> exchange and pH in erythrocytes of fish. *Comp. Biochem. Physiol.* **102**, 597-602.
- Motais, R., Fievet, B., Garcia-Romeu, F. and Thomas, S. (1989). Na<sup>+</sup>-H<sup>+</sup> exchange and pH regulation in red blood cells: role of uncatalyzed H<sub>2</sub>CO<sub>3</sub> dehydration. *Am. J. Physiol.* **256**, C728-C735.
- Near, T. J., Eytan, R. I., Dornburg, A., Kuhn, K. L., Moore, I. A., Davis, M. P., Wainwright, P. C., Friedman, M. and Smith, W. L. (2012). Resolution of ray-finned fish phylogeny and timing of diversification. *Proc. Natl. Acad. Sci. USA* **109**, 13698-13703.
- Nelson, J. S. (1994). *Fishes of the World*. New York, NY: John Wiley & Sons, Inc.
- Nikinmaa, M., Tiihonen, K. and Paajaste, M. (1990). Adrenergic control of red cell pH in salmonid fish: roles of the sodium/proton exchange, Jacobs-Stewart cycle and membrane potential. *J. Exp. Biol.* **154**, 257-271.
- Nikinmaa, M. (1992). Membrane transport and control of hemoglobin-oxygen affinity in nucleated erythrocytes. *Physiol. Rev.* **72**, 301-321.
- Nikinmaa, M. (1997). Oxygen and carbon dioxide transport in vertebrate erythrocytes: an evolutionary change in the role of membrane transport. *J. Exp. Biol.* **200**, 369-380.
- Nilsson, G. E. and Randall, D. J. (2010). Adaptations to hypoxia in fishes. In *Respiratory Physiology of Vertebrates* (ed. G. E. Nilsson), pp. 131-173. Cambridge: Cambridge University Press.
- Pelster, B. (1994). Adrenergic control of swimbladder perfusion in the european eel, *Anguilla anguilla*. *J. Exp. Biol.* **189**, 237-250.
- Pelster, B. and Randall, D. J. (1998). The physiology of the Root effect. In *Fish Physiology*, Vol 17 (ed. S. F. Perry, B. Tufts, W. S. Hoar, D. J. Randall and A. P. Farrell), pp. 113-139. New York, NY: Academic Press.
- Perry, S. F., Brauner, C. J., Tufts, B. and Gilmour, K. M. (1997). Acid-base disequilibrium in venous blood of rainbow trout (*Oncorhynchus mykiss*). *Exp. Biol. Online* **2**, 1-10.
- Perry, S. F. and Gilmour, K. (1993). An evaluation of factors limiting carbon dioxide excretion by trout red blood cells *in vitro*. *J. Exp. Biol.* **180**, 39-54.
- Perry, S. F., Gilmour, K. M., Bernier, N. J. and Wood, C. M. (1999). Does gill boundary layer carbonic anhydrase contribute to carbon dioxide excretion: a comparison between dogfish (*Squalus acanthias*) and rainbow trout (*Oncorhynchus mykiss*). *J. Exp. Biol.* **202**, 749-756.
- Peters, T., Papadopoulos, F., Kubis, H. and Gros, G. (2000). Properties of a carbonic anhydrase inhibitor protein in flounder serum. *J. Exp. Biol.* **203**, 3003-3009.
- Primmett, D., Randall, D., Mazeaud, M. and Boutilier, R. (1986). The role of catecholamines in erythrocyte pH regulation and oxygen transport in rainbow trout (*Salmo gairdneri*) during exercise. *J. Exp. Biol.* **122**, 139-148.
- Rahim, S. M., Delaunoy, J. P. and Laurent, P. (1988). Identification and immunocytochemical localization of two different carbonic anhydrase isoenzymes in teleostean fish erythrocytes and gill epithelia. *Histochem. Cell Biol.* **89**, 451-459.
- Randall, D. J. (1998). Factors influencing the optimization of hemoglobin oxygen transport in fish. In *Principles of Animal Design: The Optimization Symmorphosis Debate* (ed. E. R. Weibel, C. R. Taylor and L. Bolis), pp. 195-201. Cambridge: Cambridge University Press.
- Randall, D. J., Burggren, W. W., Farrell, A. P. and Haswell, M. S. (1981). *The Evolution of Air Breathing Vertebrates*. New York, NY: Cambridge University Press.
- Randall, D. J. and Daxboeck, C. (1982). Cardiovascular changes in the rainbow trout (*Salmo gairdneri* Richardson) during exercise. *Can. J. Zool.* **60**, 1135-1140.
- Randall, D. J. and Daxboeck, C. (1984). Oxygen and carbon dioxide transfer across fish gills. In *Fish Physiology*, Vol. 10A (ed. W. S. Hoar and D. J. Randall), pp. 263-314. New York, NY: Academic Press.
- Randall, D. J. and Smith, J. C. (1967). The regulation of cardiac activity in fish in a hypoxic environment. *Physiol. Zool.* **40**, 104-113.
- Regan, M. and Brauner, C. (2010a). The evolution of Root effect hemoglobins in the absence of intracellular pH protection of the red blood cell: Insights from primitive fishes. *J. Comp. Physiol. B* **180**, 695-706.
- Regan, M. and Brauner, C. (2010b). The transition in hemoglobin proton-binding characteristics within the basal Actinopterygian fishes. *J. Comp. Physiol. B* **180**, 521-530.
- Romero, M., Guizouarn, H., Pellissier, B., Garcia-Romeu, F. and Motais, R. (1996). The erythrocyte Na<sup>+</sup>/H<sup>+</sup> exchangers of eel (*Anguilla anguilla*) and rainbow trout (*Oncorhynchus mykiss*): a comparative study. *J. Exp. Biol.* **199**, 415-426.
- Rummer, J. L. and Brauner, C. J. (2011). Plasma-accessible carbonic anhydrase at the tissue of a teleost fish may greatly enhance oxygen delivery: *in vitro* evidence in rainbow trout, *Oncorhynchus mykiss*. *J. Exp. Biol.* **214**, 2319-2328.
- Rummer, J. L., McKenzie, D. J., Innocenti, A., Supuran, C. T. and Brauner, C. J. (2013). Enhanced muscle oxygen delivery may represent the incipient function of the Root effect in ray-finned fishes. *Science* **340**, 1327-1329.
- Rummer, J. L., Roshan-Moniri, M., Balfry, S. K. and Brauner, C. J. (2010). Use it or lose it? Sablefish, *Anoplopoma fimbria*, a species representing a fifth teleostean group where the βNHE associated with the red blood cell adrenergic stress response has been secondarily lost. *J. Exp. Biol.* **213**, 1503-1512.
- Sender, S., Gros, G., Waheed, A., Hageman, G. and Sly, W. (1994). Immunohistochemical localization of carbonic anhydrase IV in capillaries of rat and human skeletal muscle. *J. Histochem. Cytochem.* **42**, 1229-1236.
- Siffert, W. and Gros, G. (1982). Carbonic anhydrase C in white-skeletal-muscle tissue. *J. Biochem.* **205**, 559-566.
- Sollid, J., De Angelis, P., Gundersen, K. and Nilsson, G. E. (2003). Hypoxia induces adaptive and reversible gross morphological changes in crucian carp gills. *J. Exp. Biol.* **206**, 3667-3673.

- Stevens, E. D. and Randall, D. J.** (1967). Changes in gas concentrations in blood and water during moderate swimming activity in rainbow trout. *J. Exp. Biol.* **46**, 307-315.
- Swenson, E. R. and Maren, T. H.** (1987). Roles of gill and red cell carbonic anhydrase in elasmobranch  $\text{HCO}_3^-$  and  $\text{CO}_2$  excretion. *Am. J. Physiol.* **22**, R450-R458.
- Swietach, P., Tiffert, T., Mauritz, J. M. A., Seear, R., Esposito, A., Kaminski, C. F., Lew, V. L. and Vaughan-Jones, R. D.** (2010). Hydrogen ion dynamics in human red blood cells. *J. Physiol.* **588**, 4995-5014.
- Tang, C. H. and Lee, T. H.** (2007). The novel correlation of carbonic anhydrase II and anion exchanger 1 in gills of the spotted green pufferfish, *Tetraodon nigroviridis*. *J. Exp. Zool.* **307A**, 411-418.
- Tufts, B. L.** (1992). In vitro evidence for sodium dependent pH regulation in sea lamprey (*Petromyzon marinus*) red blood cells. *Can. J. Zool.* **70**, 411-416.
- Val, A. L.** (2000). Organic phosphates in the red blood cells of fish. *Comp. Biochem. Physiol.* **125A**, 417-435.
- Wang, Y., Henry, R. P., Wright, P. M., Heigenhauser, G. J. F. and Wood, C. M.** (1998). Respiratory and metabolic functions of carbonic anhydrase in exercised white muscle of trout. *Am. J. Physiol.* **275**, R1766-R1779.
- Ward, P.** (2006). *Out of Thin Air: Dinosaurs, Birds and Earth's Ancient Atmosphere*. Washington, DC: Joseph Henry Press.
- Waser, W. and Heisler, N.** (2005). Oxygen delivery to the fish eye: Root effect as crucial factor for elevated retinal  $\text{PO}_2$ . *J. Exp. Biol.* **208**, 4035-4047.
- Weaver, Y., Kiessling, K. and Cossins, A.** (1999). Responses of the  $\text{Na}^+/\text{H}^+$  exchanger of European flounder red blood cells to hypertonic,  $\beta$ -adrenergic and acidotic stimuli. *J. Exp. Biol.* **202**, 21-32.
- Wells, R. M. G.** (2009). Blood-gas transport and hemoglobin function: adaptations for functional and environmental hypoxia. In *Fish Physiology*, Vol. 27 (ed. A. P. Farrell, J. G. Richards and C. J. Brauner), pp. 255-299. New York, NY: Academic Press.
- Wilson, J. M., Randall, D. J., Vogl, A. W., Harris, J., Sly, W. S. and Iwama, G. K.** (2000). Branchial carbonic anhydrase is present in the dogfish, *Squalus acanthias*. *Fish Physiol. Biochem.* **22**, 329-336.
- Wittenberg, J. B. and Haedrich, R. L.** (1974). The choroid rete mirabile of the fish eye. II. Distribution and relation to the pseudobranch and to the swimbladder rete mirabile. *Biol. Bull.* **146**, 137-156.
- Wittenberg, J. B. and Wittenberg, B. A.** (1962). Active secretion of oxygen into the eye of fish. *Nature* **194**, 106-107.
- Wittenberg, J. B. and Wittenberg, B. A.** (1974). The choroid rete mirabile of the fish eye. I. Oxygen secretion and structure: comparison with the swimbladder rete mirabile. *Biol. Bull.* **146**, 116-136.
- Wood, C. and Munger, R.** (1994). Carbonic anhydrase injection provides evidence for the role of blood acid-base status in stimulating ventilation after exhaustive exercise in rainbow trout. *J. Exp. Biol.* **194**, 225-253.
- Yamamoto, K., Itazawa, Y. and Kobayashi, H.** (1985). Direct observation of fish spleen by an abdominal window method and its application to exercised and hypoxic yellowtail (*Seriola quinqueradiata*). *Jpn. J. Ichthyol.* **31**, 427-433.
